# Supplementary material
Source: publisher site journal article supplement (https://www.spandidos-publications.com/4018/downloadSupplementary)

Figure S1. Scramble NC, mimic NC and inhibitor NC were transfected into (A) HT29 and (B) SW620 cells. miR-146-5p expression was determined using reverse transcription-quantitative PCR. miR, microRNA; NC, negative control.

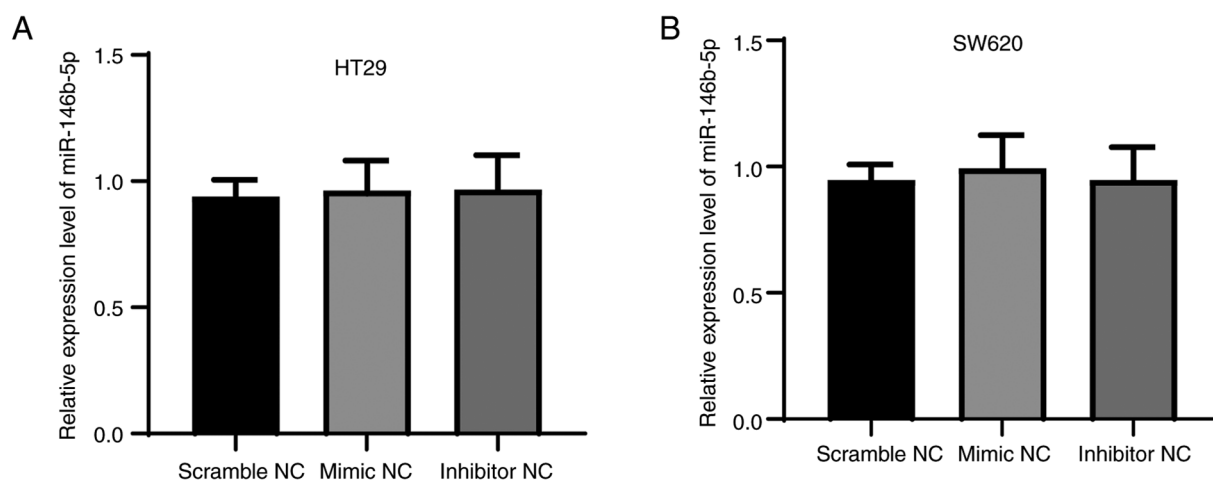

Figure S2. (A) HT29 and (B) SW620 cells were transfected with GFP-TRAF6 (TRAF6) or empty vector (Vector). Untransfected cells were used as control group (Control). TRAF6 expression was determined by western blotting. GFP fluorescence was shown in (C) HT29 and (D) SW620 cells transfected with GFP vector or GFP-TRAF6. GFP, green fluorescence protein; TRAF6, tumor necrosis factor receptor-associated factor 6.

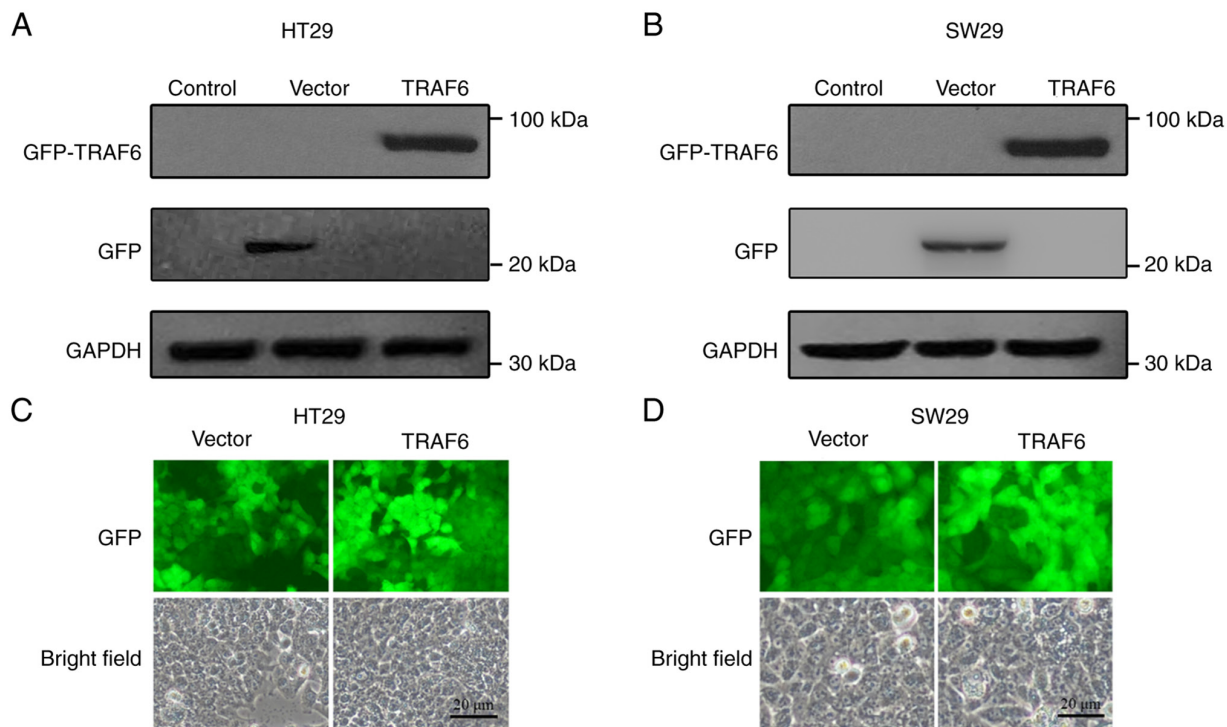

Supplement: Supplementary file 1 [file downloadSupplementary]
